# Supplementary material for: Engineering the unicellular alga Phaeodactylum tricornutum for high‐value plant triterpenoid production
Source: PubMed Central journal article supplement (PMC6330534; doi:10.1111/pbi.12948), 2018-06-19
Supplement: PBI-17-75-s003.pdf [file PBI-17-75-s003.pdf]

## Table S5, Repeated measures significance of the genes shown in figure 6

R code used for the generation of the model:

```
repMes = function(exp, gene) {  
  long = subset(exp, Target==gene)  
  summary(aov(Expression ~ Sample*Day + Error(Flask), data=long))  
}
```

Results of the repeated measures ANOVA:

### CAS

```
##  
## Error: Flask  
##      Df Sum Sq Mean Sq  
## Sample  1 0.2549  0.2549  
##  
## Error: Within  
##      Df Sum Sq Mean Sq F value Pr(>F)  
## Sample  1 0.0662  0.0662  0.999 0.33329  
## Day      3 1.1227  0.3742  5.652 0.00853 **  
## Sample:Day 3 0.3899  0.1300  1.963 0.16295  
## Residuals 15 0.9932  0.0662  
## ---  
## Signif. codes:  0 '***' 0.001 '**' 0.01 '*' 0.05 '.' 0.1 ' ' 1
```

### Methylsterol Oxygenase

```
##  
## Error: Flask  
##      Df Sum Sq Mean Sq  
## Sample  1 0.003447 0.003447  
##  
## Error: Within  
##      Df Sum Sq Mean Sq F value Pr(>F)  
## Sample  1 0.3164  0.3164  4.021 0.06333 .  
## Day      3 0.2834  0.0945  1.201 0.34338  
## Sample:Day 3 1.3647  0.4549  5.781 0.00783 **  
## Residuals 15 1.1804  0.0787  
## ---  
## Signif. codes:  0 '***' 0.001 '**' 0.01 '*' 0.05 '.' 0.1 ' ' 1
```

## Sterol Dehydrogenase

```
##
## Error: Flask
##      Df Sum Sq Mean Sq
## Sample 1 0.247  0.247
##
## Error: Within
##      Df Sum Sq Mean Sq F value Pr(>F)
## Sample 1 0.7198 0.7198 10.678 0.00519 **
## Day    3 0.1457 0.0486  0.721 0.55509
## Sample:Day 3 0.4620 0.1540  2.284 0.12061
## Residuals 15 1.0112 0.0674
## ---
## Signif. codes:  0 '***' 0.001 '**' 0.01 '*' 0.05 '.' 0.1 ' ' 1
```

## HMGCoA-Synthase

```
##
## Error: Flask
##      Df      Sum Sq      Mean Sq
## Sample 1 7.387e-06 7.387e-06
##
## Error: Within
##      Df Sum Sq Mean Sq F value Pr(>F)
## Sample 1 0.1757 0.1757  5.010 0.04079 *
## Day    3 0.9643 0.3214  9.167 0.00109 **
## Sample:Day 3 0.9018 0.3006  8.573 0.00149 **
## Residuals 15 0.5260 0.0351
## ---
## Signif. codes:  0 '***' 0.001 '**' 0.01 '*' 0.05 '.' 0.1 ' ' 1
```

## HMGR

```
##
## Error: Flask
##      Df Sum Sq Mean Sq
## Sample 1 0.7428 0.7428
##
## Error: Within
##      Df Sum Sq Mean Sq F value Pr(>F)
## Sample 1 0.9322 0.9322 17.620 0.000777 ***
## Day    3 0.4647 0.1549  2.928 0.067884 .
## Sample:Day 3 0.6189 0.2063  3.899 0.030449 *
```

```
## Residuals 15 0.7936 0.0529
## ---
## Signif. codes: 0 '***' 0.001 '**' 0.01 '*' 0.05 '.' 0.1 ' ' 1
```

## IDI-SQS

```
##
## Error: Flask
##      Df Sum Sq Mean Sq
## Sample 1 0.5596 0.5596
##
## Error: Within
##      Df Sum Sq Mean Sq F value Pr(>F)
## Sample 1 0.8175 0.8175 14.336 0.00179 **
## Day 3 0.1448 0.0483 0.847 0.48963
## Sample:Day 3 0.5466 0.1822 3.195 0.05402 .
## Residuals 15 0.8553 0.0570
## ---
## Signif. codes: 0 '***' 0.001 '**' 0.01 '*' 0.05 '.' 0.1 ' ' 1
```

## Monooxygenase

```
##
## Error: Flask
##      Df Sum Sq Mean Sq
## Sample 1 0.8848 0.8848
##
## Error: Within
##      Df Sum Sq Mean Sq F value Pr(>F)
## Sample 1 1.0839 1.0839 19.033 0.000557 ***
## Day 3 0.4604 0.1535 2.695 0.083234 .
## Sample:Day 3 0.3599 0.1200 2.106 0.142310
## Residuals 15 0.8542 0.0569
## ---
## Signif. codes: 0 '***' 0.001 '**' 0.01 '*' 0.05 '.' 0.1 ' ' 1
```

## ISPD-MEP

```
##
## Error: Flask
##      Df Sum Sq Mean Sq
## Sample 1 0.05656 0.05656
##
## Error: Within
##      Df Sum Sq Mean Sq F value Pr(>F)
## Sample 1 0.2431 0.2431 2.969 0.10541
## Day 3 0.1976 0.0659 0.805 0.51064
## Sample:Day 3 1.8632 0.6211 7.587 0.00257 **
```

```
## Residuals 15 1.2280 0.0819
## ---
## Signif. codes: 0 '***' 0.001 '**' 0.01 '*' 0.05 '.' 0.1 ' ' 1
```

## IspE-MEP

```
##
## Error: Flask
##      Df Sum Sq Mean Sq
## Sample 1 0.1688 0.1688
##
## Error: Within
##      Df Sum Sq Mean Sq F value Pr(>F)
## Sample 1 0.0710 0.07101 1.416 0.2525
## Day 3 0.1332 0.04439 0.885 0.4710
## Sample:Day 3 0.5789 0.19297 3.849 0.0317 *
## Residuals 15 0.7521 0.05014
## ---
## Signif. codes: 0 '***' 0.001 '**' 0.01 '*' 0.05 '.' 0.1 ' ' 1
```
